# Supplementary material for: Pinning down the solid-state polymorphism of the ionic liquid [bmim][PF6]
Source: Royal Society of Chemistry journal article supplement (doi:10.1039/c2sc21959j), 2013-01-01
Supplement: c2sc21959j.pdf [file c2sc21959j.pdf]

## Electronic Supporting Information

# Pinning down the solid-state polymorphism of the ionic liquid [bmim][PF<sub>6</sub>]

Sofiane Saouane,<sup>a</sup> Sarah E. Norman,<sup>b</sup> Christopher Hardacre,<sup>b\*</sup> and Francesca P. A. Fabbiani.<sup>a\*</sup>

*ffabbia@gwdg.de*  
*c.hardacre@qub.ac.uk*

### Single-crystal X-ray diffraction

Data integration and global-cell refinement were performed using the program SAINT.<sup>1</sup> High-pressure data processing was performed according to the procedure by Dawson *et al.*<sup>2</sup> Unless otherwise specified the program SADABS<sup>3</sup> was used to correct for absorption and systematic errors. For the high-pressure data, the program SHADE<sup>4</sup> was additionally used. All structures were solved with direct methods using SHELXS.<sup>5</sup> All non-H atoms were refined with anisotropic displacement parameters. All H-atoms were placed geometrically and allowed to ride on the parent atoms.  $U_{\text{iso}}(\text{H})$  values were assigned in the range 1.2–1.5 times  $U_{\text{eq}}$  of the parent atom. Full-matrix least-squares structure refinement against  $F^2$  was performed using SHELXL<sup>5</sup> through the SHELXLE GUI.<sup>6</sup>

#### $\alpha$ -phase

Sample transfer to the diffractometer proved to be particularly difficult for this phase as any mechanical interference with the crystal at high enough temperatures where the crystal could be manipulated resulted in a phase transition. A suitable crystal for diffraction was hence grown on a secondary glass shard support placed on the Linkam stage and the shard was subsequently mounted on a Bruker SMART 6000 Apex II CCD diffractometer. Diffraction data were collected using Cu K $\alpha$  radiation of  $\lambda = 1.54178 \text{ \AA}$  from a rotating anode at 100(2) and 193(2) K. The structure at 100 K was found to be ordered. At 193 K disorder could be modelled for the [PF<sub>6</sub>]<sup>-</sup> anion [0.44(2) : 0.56(2)] and for the atoms C8 and C9 of the butyl side chain [0.752(13) : 0.248(13)] using two-site split models. To ensure reasonable anion geometry, restraints on bond distances and angles as well as on anisotropic displacement parameters were used. Distance restraints were also used for the disordered atoms in the cation.

#### $\beta$ -phase

Diffraction data were collected using a Bruker AXS SMART Apex II CCD diffractometer equipped with Mo K $\alpha$  sealed-tube radiation of  $\lambda = 0.71073 \text{ \AA}$  for an *in situ* grown crystal contained in a capillary at 193(2) K. A similar diffractometer equipped with a Ag microsource (Incoatec) of  $\lambda = 0.56085 \text{ \AA}$  was used for the 293(2) K high-pressure DAC experiment. Both low-temperature and high-pressure structures were found to be pseudomerohedral triclinic twins, with unit-cell constants emulating a monoclinic *C* metric cell and a [-1 1 0] twin direction; the twin law is expressed by the matrix (0 -1 0/ -1 0 0/ 0 0 -1). As expected, the lowest deviation from perfect monoclinic *C* symmetry was observed for the high-pressure structure collected at phase-boundary conditions and this is also

the structure exhibiting the highest degree of pseudosymmetry and perfect domain overlap. Further compression of the single crystal to *ca.* 0.35 GPa resulted in a unit cell with a higher degree of deviation from a perfect monoclinic *C* cell [triclinic unit-cell parameters:  $a = 9.4360(15)$ ,  $b = 9.4899(8)$ ,  $c = 14.4658(8)$  Å,  $\alpha = 98.944(5)$ ,  $\beta = 98.754(9)$ ,  $\gamma = 100.586(9)^\circ$ ]. Two orientation matrices were used to integrate the low-temperature data, for which the two twin components did not perfectly overlap; the program TWINABS<sup>7</sup> was used to correct for absorption and systematic errors and a HKLF5 reflection file was used for the refinement of the low-temperature structure. The twin scale factors were 0.445(5) and 0.509(18) for the low-temperature and high-pressure crystals, respectively. The octahedral geometry of the F-atoms was enforced through the use of restraints whilst opposite F-atoms were constrained to have the same anisotropic displacement parameters. For the high-pressure structure, disordered C-atoms were refined with isotropic displacement parameters. Both [PF<sub>6</sub>]<sup>-</sup> anions were found to be disordered. A two-component disorder model was refined for each of these groups with occupancy factors refining to approximately 50:50 values at both low temperature and high pressure (occupancies were fixed to these values for the high-pressure refinement). Disorder was additionally found in the butyl side chain of the cations: at low temperature disorder was clearly identifiable for carbon C10 in one of two symmetry-independent molecules [0.68(4) : 0.32(4)]. At high pressure terminal methyl carbons were disordered in both molecules [site occupancies were fixed to 0.7 : 0.3 after initial refinement]. Distance, angle, as well as rigid-bond (DELU) and thermal similarity (SIMU) restraints were applied to ensure reasonable molecular geometries and ADPs and increase the data to parameter ratio, in particular for the high-pressure data. In addition, the independent molecules in the asymmetric unit were restrained to have similar geometries. The preference for using a heavily restrained anisotropic model over the use of an isotropic model with fewer parameters for crystals whose weak diffraction can be ascribed to large thermal motion has been discussed by Watkin.<sup>8</sup>

### ***$\gamma$ -phase***

Diffraction data were collected on a single crystal grown on the Linkam stage and transferred to a Bruker AXS SMART Apex II CCD diffractometer with Mo K $\alpha$  sealed-tube radiation of  $\lambda = 0.71073$  Å at 263(2) K. A minor but significant disordered component of the butyl side chain, atoms C8 and C9, could be successfully refined using a split-site model [0.921(8) : 0.079(8)]. The residual electron density was distributed around the anion but no disorder could be modelled satisfactorily; the resulting anisotropic displacement parameters are not unusually large for a 263 K structure.

### ***Disorder of the [PF<sub>6</sub>]<sup>-</sup> anion in the solid state***

Rotational disorder of the [PF<sub>6</sub>]<sup>-</sup> group is often observed in the solid state, as expected for a highly symmetric molecule. At 193 K the only crystalline phase which does not show evidence of anion disorder is that of  $\gamma$ , which incidentally is also the most dense phase at this temperature. In the  $\alpha$ -phase the nature of the anion disorder is most likely to be dynamic, as exemplified by the ordering observed on cooling the single-crystal from 193 to 100 K. In the  $\beta$ -phase at 193 K, the two crystallographically

independent anions are both extensively disordered about axial F-P-F bonds (F101-P1-F103 and F204-P11-F206 for molecules 1 and 2, respectively); at low temperature the [PF<sub>6</sub>]<sup>-</sup> groups were found to be primarily disordered about an axis rotation, whilst at high pressure an additional significant tilt component was observed. A similar but less pronounced type of disorder is also observed in the slightly denser  $\alpha$ -phase at 193 K (about the F2-P1-F5 axis). The trends in the anion disorder in the crystalline state are in agreement with the results of the spin-lattice rotational dynamics study of Endo *et al.*<sup>9</sup>

**Table S1.** Geometric parameters describing the planar or nearly planar centrosymmetric and pseudo-centrosymmetric dimeric arrangements of the cations in the three polymorphs of [bmim][PF<sub>6</sub>].

|                 |                                                   | Centroid-centroid distance / Å | Dihedral angle between ring planes/ <sup>o</sup> | Interplanar <sup>c</sup> distance / Å | Offset / Å <sup>d</sup> |
|-----------------|---------------------------------------------------|--------------------------------|--------------------------------------------------|---------------------------------------|-------------------------|
| $\alpha$ -phase | "open" dimer<br><b>100 K</b>                      | 5.0554(9) <sup>a</sup>         | 0                                                | 3.5298(7)                             | 3.619                   |
|                 | "open" dimer<br><b>193 K</b>                      | 5.0668(14)                     | 0                                                | 3.6224(11)                            | 3.543                   |
| $\beta$ -phase  | "open" dimer<br><b>193 K Cg1 Cg1</b> <sup>b</sup> | 4.818(5)                       | 0                                                | 3.715(4)                              | 3.068                   |
|                 | "closed" dimer<br><b>193 K Cg1 Cg2</b>            | 5.950(5)                       | 6.2(5)                                           | 5.452(4)                              | -                       |
|                 | "open" dimer<br><b>193 K Cg2 Cg2</b>              | 4.490(5)                       | 0                                                | 3.832(4)                              | 2.342                   |
|                 | "open" dimer<br><b>0.07 GPa Cg1 Cg1</b>           | 4.762(12)                      | 0                                                | 3.877(10)                             | 2.765                   |
|                 | "closed" dimer<br><b>0.07 GPa Cg1 Cg2</b>         | 6.082(12)                      | 3.9(13)                                          | 5.542(10)                             | -                       |
|                 | "open" dimer<br><b>0.07 GPa Cg2 Cg2</b>           | 4.732(10)                      | 0                                                | 3.837(8)                              | 2.770                   |
| $\gamma$ -phase | "open" dimer<br><b>193 K</b>                      | 4.865(6)                       | 0                                                | 3.4856(9)                             | 3.394                   |
|                 | "closed" dimer<br><b>193 K</b>                    | 6.133(7)                       | 0                                                | 4.3688(9)                             | 4.304                   |
|                 | "open" dimer<br><b>263 K</b>                      | 4.857(2)                       | 0                                                | 3.5357(15)                            | 3.330                   |
|                 | "closed" dimer<br><b>263 K</b>                    | 6.152(2)                       | 0                                                | 4.4425(15)                            | 4.255                   |

<sup>a</sup> All standard deviations were calculated with the program PLATON<sup>10</sup>. Atoms N1, C2, N3, C4, C5 were chosen to define a ring, the derived centroid and the least-squares plane. <sup>b</sup> For the  $\beta$ -phase the aforementioned atoms define Cg1. Atoms N11, C12, N13, C14, C15 define Cg2. <sup>c</sup> The interplanar distance is defined as the perpendicular distance between the centroid of one ring onto the second ring plane. <sup>d</sup> The offset is defined as the distance between the centroid of one ring and the perpendicular projection of the centroid of the second ring onto the first ring plane.

**Table S2.** Coordination numbers for the cation and anion, as well as short H...F contacts in the three polymorphs of [bmim][PF<sub>6</sub>].

|                      |                      | Cation<br>C.N. <sup>a</sup> | Anion<br>C.N. | H...F contacts < sum vdW   |                      | Total number of<br>H...F contacts <<br>sum vdW <sup>c</sup> |
|----------------------|----------------------|-----------------------------|---------------|----------------------------|----------------------|-------------------------------------------------------------|
| <i>α</i> -<br>phase  | 100 K                | 7 Anions                    | 7             | Imid. <sup>b</sup>         | H2, H4, H5           | <b>8</b>                                                    |
|                      |                      | 4 Cations                   | Cations       | Me-imid.                   | H6B, H6C             |                                                             |
|                      |                      |                             | Butyl         | H7A                        |                      |                                                             |
|                      | 193 K                | 7 Anions                    | 7             | Imid.                      | H2, H4, H5           |                                                             |
| 6 Cations            |                      | Cations                     | Me-imid.      | H6B, H6C                   |                      |                                                             |
|                      |                      |                             | Butyl         | H7A, H7C                   |                      |                                                             |
|                      |                      |                             |               |                            |                      |                                                             |
| <i>β</i> -<br>phase  | 193 K<br>Mol 1       | 7 Anions                    | 1 Anion       | Imid.                      | H2, H4, H5           | <b>8</b>                                                    |
|                      |                      | 3 Cations                   | 8             | Me-imid.                   | H6A, H6B             |                                                             |
|                      |                      |                             |               | Cations                    | Butyl                | H7A, H7B, H8A, H8B                                          |
|                      | 193 K<br>Mol 2       | 6 Anions                    | 1 Anion       | Imid.                      | H12, H14, H15        | <b>7</b>                                                    |
|                      |                      | 2 Cations                   | 8             | Me-imid.                   | H16A, H16B, H16C     |                                                             |
|                      |                      |                             |               | Cations                    | Butyl                | H17B, H18A, H20A                                            |
|                      |                      |                             |               |                            |                      |                                                             |
| 0.07<br>GPa<br>Mol 1 | 8 Anions             | 8                           | 8             | Imid.                      | H2, H4, H5           | <b>6</b>                                                    |
|                      |                      | 4 Cations                   | Cations       | Me-imid.                   | H6A, H6B             |                                                             |
|                      |                      |                             |               | Butyl                      | H7A, H7B, H8A, H8C   |                                                             |
|                      | 0.07<br>GPa<br>Mol 2 | 7 Anions                    | 8             | Imid.                      | H12, H14, H15        | <b>6</b>                                                    |
| 4 Cations            |                      | Cations                     | Me-imid.      | H16A, H16C,                |                      |                                                             |
|                      |                      |                             | Butyl         | H17A, H17B, H18A, H20A     |                      |                                                             |
|                      |                      |                             |               |                            |                      |                                                             |
| <i>γ</i> -<br>phase  | 193 K                | 8 Anions                    | 8             | Imid.                      | H2, H4, H5           | <b>11</b>                                                   |
|                      |                      | 4 Cations                   | Cations       | Me-imid.                   | H6A, H6B             |                                                             |
|                      |                      |                             |               | Butyl                      | H7B, H8A, H10A, H10C |                                                             |
|                      | 263 K                | 8 Anions                    | 8             | Imid.                      | H2, H4, H5           | <b>9</b>                                                    |
| 5 Cations            |                      | Cations                     | Me-imid.      | H6A,                       |                      |                                                             |
|                      |                      |                             | Butyl         | H7B, H7D, H10A, H10C, H10D |                      |                                                             |
|                      |                      |                             |               |                            |                      |                                                             |

<sup>a</sup> C.N. = Coordination number, defined as the number of molecules with distances < sum of van der Waals (vdW) radii + 0.2 Å. Contacts were identified using the programs PLATON<sup>10</sup> and MERCURY.<sup>11</sup> vdW radius for H = 1.20 Å, vdW radius for F = 1.47 Å. For the determination of C.N. all disorder components were considered. <sup>b</sup> H atoms are grouped according their chemical environment: Imidazolium (Imid.), Methyl-imidazolium (Me-imid.) and butyl (Butyl). <sup>c</sup> Total number of contacts: contacts involving disordered atoms were weighted according to site occupancies and rounded to the nearest integer, see Table S3 for details.

**Table S3.** Short contacts with H...F distances < sum of vdW radii. vdW radius for H = 1.20 Å, vdW radius for F = 1.47 Å. The programs Mercury<sup>11</sup> and Platon<sup>10</sup> were used to check these values. The structure of the  $\gamma$ -form at 193 K was taken from MAZXOB01.

|                                                          |          |          |          |            |                  |                  |                    |                                                             |          |          |          |            |                  |                  |                    | Symmetry codes |                |
|----------------------------------------------------------|----------|----------|----------|------------|------------------|------------------|--------------------|-------------------------------------------------------------|----------|----------|----------|------------|------------------|------------------|--------------------|----------------|----------------|
| <b>Alpha 100 K</b>                                       |          |          |          |            |                  |                  |                    | <b>Alpha 193 K</b>                                          |          |          |          |            |                  |                  |                    |                |                |
|                                                          | <b>C</b> | <b>H</b> | <b>X</b> | <b>ARU</b> | <b>H...X/Ang</b> | <b>C...F/Ang</b> | <b>C - H...F/°</b> |                                                             | <b>C</b> | <b>H</b> | <b>X</b> | <b>ARU</b> | <b>H...X/Ang</b> | <b>C...F/Ang</b> | <b>C - H...F/°</b> |                |                |
| 1                                                        | C2       | H2       | F3       | 4555.02    | 2.61             | 3.4466(18)       | 146                | 0.5                                                         | C2       | H2       | F51      | 4555.02    | 2.32             | 3.062(6)         | 134                | [ 6455]        | =-1/2+x,y,1/2- |
| 1                                                        | C2       | H2       | F5       | 4555.02    | 2.29             | 3.0412(17)       | 135                | 0.5                                                         | C2       | H2       | F5       | 4555.02    | 2.38             | 3.064(9)         | 128                | [ 4555]        | =-x,1/2+y,1/2- |
| 1                                                        | C4       | H4       | F1       | 8565.02    | 2.47             | 3.4128(19)       | 170                | 0.5                                                         | C4       | H4       | F11      | 8565.02    | 2.49             | 3.436(5)         | 175                | [ 8565]        | =x,3/2-y,1/2+i |
| 1                                                        | C4       | H4       | F5       | 8565.02    | 2.65             | 3.2448(18)       | 121                | 0.5                                                         | C4       | H4       | F1       | 8565.02    | 2.57             | 3.503(9)         | 167                | [ 4545]        | =-x,-1/2+y,1/2 |
| 1                                                        | C5       | H5       | F1       | 4545.02    | 2.54             | 3.2328(19)       | 130                | 0.5                                                         | C4       | H4       | F5       | 8565.02    | 2.55             | 3.207(9)         | 127                | [ 6555]        | =1/2+x,y,1/2-i |
| 1                                                        | C6       | H6B      | F6       | 8565.02    | 2.51             | 3.463(2)         | 165                | 0.5                                                         | C5       | H5       | F11      | 4545.02    | 2.64             | 3.274(7)         | 125                | [ 2475]        | =-1/2-x,2-y,1/ |
| 1                                                        | C6       | H6C      | F5       | 6455.02    | 2.49             | 3.228(2)         | 132                | 0.5                                                         | C6       | H6B      | F61      | 8565.02    | 2.45             | 3.354(12)        | 154                |                |                |
| 1                                                        | C7       | H7A      | F2       | 6555.02    | 2.63             | 3.274(2)         | 123                | 0.5                                                         | C6       | H6C      | F51      | 6455.02    | 2.52             | 3.247(7)         | 131                |                |                |
| 8 Number of contacts considering site occupancy factors  |          |          |          |            |                  |                  |                    | 0.5                                                         | C6       | H6C      | F5       | 6455.02    | 2.54             | 3.321(10)        | 137                |                |                |
|                                                          |          |          |          |            |                  |                  |                    | 0.375                                                       | C7       | H7A      | F21      | 6455.01    | 2.61             | 3.241(9)         | 122                |                |                |
|                                                          |          |          |          |            |                  |                  |                    | 0.125                                                       | C7       | H7C      | F21      | 6455.01    | 2.28             | 3.241(9)         | 162                |                |                |
|                                                          |          |          |          |            |                  |                  |                    | 0.125                                                       | C7       | H7C      | F2       | 6455.01    | 2.41             | 3.387(9)         | 169                |                |                |
|                                                          |          |          |          |            |                  |                  |                    | 5.125 Number of contacts considering site occupancy factors |          |          |          |            |                  |                  |                    |                |                |
| <b>Gamma 193 K</b>                                       |          |          |          |            |                  |                  |                    | <b>Gamma 263 K</b>                                          |          |          |          |            |                  |                  |                    |                |                |
|                                                          | <b>C</b> | <b>H</b> | <b>X</b> | <b>ARU</b> | <b>H...X/Ang</b> | <b>C...F/Ang</b> | <b>C - H...F/°</b> |                                                             | <b>C</b> | <b>H</b> | <b>X</b> | <b>ARU</b> | <b>H...X/Ang</b> | <b>C...F/Ang</b> | <b>C - H...F/°</b> |                |                |
| 1                                                        | C2       | H2       | F5       |            | 2.35             | 3.233(5)         | 152                | 1                                                           | C2       | H2       | F5       |            | 2.41             | 3.255(5)         | 152                | [ 1555]        | =x,y,z         |
| 1                                                        | C2       | H2       | F3       | 2766.02    | 2.6              | 3.192(4)         | 120                | 1                                                           | C2       | H2       | F3       | 2766.02    | 2.66             | 3.263(5)         | 123                | [ 2766]        | =2-x,1-y,1-z   |
| 1                                                        | C4       | H4       | F2       | 2756.02    | 2.45             | 3.38(5)          | 164                | 1                                                           | C4       | H4       | F2       | 2756.02    | 2.51             | 3.419(5)         | 165                | [ 2756]        | =2-x,-y,1-z    |
| 1                                                        | C5       | H5       | F2       | 1656.02    | 2.67             | 3.563(5)         | 155                | 1                                                           | C5       | H5       | F3       | 1656.02    | 2.65             | 3.461(4)         | 147                | [ 1656]        | =1+x,y,1+z     |
| 1                                                        | C5       | H5       | F3       | 1656.02    | 2.59             | 3.418(4)         | 145                | 1                                                           | C6       | H6A      | F4       | 2756.02    | 2.56             | 3.42(5)          | 149                | [ 1655]        | =1+x,y,z       |
| 1                                                        | C6       | H6A      | F4       | 2756.02    | 2.49             | 3.342(5)         | 148                | 0.92                                                        | C7       | H7B      | F6       | 1656.02    | 2.57             | 3.336(4)         | 136                | [ 2767]        | =2-x,1-y,2-z   |
| 1                                                        | C6       | H6B      | F1       | 1655.02    | 2.67             | 3.382(5)         | 131                | 0.08                                                        | C7       | H7D      | F6       | 1656.02    | 2.37             | 3.336(4)         | 173                | [ 1556]        | =x,y,1+z       |
| 1                                                        | C7       | H7B      | F6       | 1656.02    | 2.53             | 3.309(4)         | 138                | 0.92                                                        | C8A      | H8A      | F5       | 2767.02    | 2.66             | 3.632(5)         | 176                | [ 2656]        | =1-x,-y,1-z    |
| 1                                                        | C8       | H8A      | F5       | 2767.02    | 2.67             | 3.622(5)         | 175                | 0.92                                                        | C10      | H10A     | F3       | 1556.02    | 2.6              | 3.513(6)         | 159                | [ 2765]        | =2-x,1-y,z     |
| 1                                                        | C10      | H10A     | F3       | 1556.02    | 2.58             | 3.503(5)         | 162                | 0.92                                                        | C10      | H10C     | F2       | 2656.02    | 2.66             | 3.592(5)         | 165                | [ 2765]        | =2-x,1-y,z     |
| 1                                                        | C10      | H10C     | F2       | 2656.02    | 2.66             | 3.553(5)         | 155                | 0.08                                                        | C10      | H10D     | F3       | 2765.02    | 2.66             | 3.513(6)         | 149                | [ 1665]        | =1+x,1+y,z     |
| 11 Number of contacts considering site occupancy factors |          |          |          |            |                  |                  |                    | 8.76 Number of contacts considering site occupancy factors  |          |          |          |            |                  |                  |                    |                |                |

**Table S3 (cont.).** Short contacts with H...F distances < sum of vdW radii. vdW radius for H = 1.20 Å, vdW radius for F = 1.47 Å. The programs Mercury<sup>11</sup> and Platon<sup>10</sup> were used to check these values.

| Beta 193 K                                                |     |      |      |         |           |           |             | Beta 0.07 Gpa                                              |     |      |      |         |           |           |             |                      |
|-----------------------------------------------------------|-----|------|------|---------|-----------|-----------|-------------|------------------------------------------------------------|-----|------|------|---------|-----------|-----------|-------------|----------------------|
| Molecule 1                                                | C   | H    | X    | ARU     | H...X/Ang | C...F/Ang | C - H...F/° | Molecule 1                                                 | C   | H    | X    | ARU     | H...X/Ang | C...F/Ang | C - H...F/° |                      |
| 0.5                                                       | C2  | H2   | F103 | 1565.03 | 2.57      | 3.366(17) | 142         | 0.5                                                        | C2  | H2   | F113 | 1565.03 | 2.24      | 3.08(3)   | 149         | [ 1565] =x,1+y,z     |
| 0.5                                                       | C2  | H2   | F206 | 1565.04 | 2.3       | 3.018(18) | 132         | 0.5                                                        | C2  | H2   | F206 | 1565.04 | 2.59      | 3.15(3)   | 120         | [ 2665] =1-x,1-y,-z  |
| 0.5                                                       | C2  | H2   | F113 | 1565.03 | 2.37      | 3.13(19)  | 137         | 0.5                                                        | C4  | H4   | F205 | 2665.04 | 2.54      | 3.31(3)   | 140         | [ 2565] =-x,1-y,-z   |
| 0.5                                                       | C2  | H2   | F216 | 1565.04 | 2.57      | 3.188(19) | 123         | 0.5                                                        | C4  | H4   | F216 | 2665.04 | 2.34      | 3.16(3)   | 147         | [ 1665] =1+x,1+y,z   |
| 0.5                                                       | C4  | H4   | F205 | 2665.04 | 2.45      | 3.26(2)   | 143         | 0.5                                                        | C5  | H5   | F203 |         | 2.56      | 3.33(4)   | 141         | [ 1455] =-1+x,y,z    |
| 0.5                                                       | C4  | H4   | F215 | 2665.04 | 2.62      | 3.561(17) | 171         | 0.5                                                        | C6  | H6A  | F205 | 2665.04 | 2.45      | 3.35(3)   | 155         | [ 2666] =1-x,1-y,1-z |
| 0.5                                                       | C5  | H5   | F203 |         | 2.45      | 3.308(19) | 150         | 0.5                                                        | C6  | H6C  | F105 | 1565.03 | 2.38      | 3.13(4)   | 134         | [ 2566] =-x,1-y,1-z  |
| 0.5                                                       | C6  | H6A  | F105 | 1565.03 | 2.47      | 3.246(19) | 136         | 0.5                                                        | C7  | H7A  | F201 | 1565.04 | 2.35      | 3.21(3)   | 146         | [ 2555] =-x,-y,-z    |
| 0.5                                                       | C6  | H6B  | F205 | 2665.04 | 2.65      | 3.51(2)   | 146         | 0.5                                                        | C7  | H7B  | F104 | 1665.03 | 2.6       | 3.45(3)   | 147         |                      |
| 0.5                                                       | C6  | H6B  | F115 | 2565.03 | 2.46      | 2.86(2)   | 104         | 0.5                                                        | C7  | H7B  | F111 | 1665.03 | 2.54      | 3.44(4)   | 155         |                      |
| 0.5                                                       | C7  | H7A  | F101 | 1665.03 | 2.5       | 3.44(2)   | 159         | 0.35                                                       | C8  | H8A  | F202 |         | 2.46      | 3.33(3)   | 151         |                      |
| 0.5                                                       | C7  | H7A  | F111 | 1665.03 | 2.38      | 3.35(2)   | 166         | 0.35                                                       | C8  | H8A  | F213 |         | 2.4       | 3.35(3)   | 176         |                      |
| 0.5                                                       | C7  | H7B  | F201 | 1565.04 | 2.28      | 3.21(2)   | 155         | 0.15                                                       | C8  | H8C  | F202 |         | 2.51      | 3.33(3)   | 144         |                      |
| 0.5                                                       | C8  | H8A  | F213 |         | 2.26      | 3.205(19) | 160         | 0.15                                                       | C8  | H8C  | F213 |         | 2.55      | 3.35(3)   | 142         |                      |
| 0.5                                                       | C8  | H8B  | F106 | 1565.03 | 2.66      | 3.54(2)   | 148         | 6 Number of contacts considering site occupancy factors    |     |      |      |         |           |           |             |                      |
| 7.5 Number of contacts considering site occupancy factors |     |      |      |         |           |           |             |                                                            |     |      |      |         |           |           |             |                      |
| Molecule 2                                                | C   | H    | X    | ARU     | H...X/Ang | C...F/Ang | C - H...F/° | Molecule 2                                                 | C   | H    | X    | ARU     | H...X/Ang | C...F/Ang | C - H...F/° |                      |
| 0.5                                                       | C12 | H12  | F101 | 1565.03 | 2.43      | 3.32(18)  | 156         | 0.5                                                        | C12 | H12  | F101 | 1565.03 | 2.51      | 3.26(3)   | 138         |                      |
| 0.5                                                       | C12 | H12  | F111 | 1565.03 | 2.3       | 3.193(19) | 156         | 0.5                                                        | C12 | H12  | F111 | 1565.03 | 2.44      | 3.2(3)    | 139         |                      |
| 0.5                                                       | C12 | H12  | F204 | 1455.04 | 2.61      | 2.921(16) | 99          | 0.5                                                        | C12 | H12  | F204 | 1455.04 | 2.24      | 2.74(3)   | 112         |                      |
| 0.5                                                       | C14 | H14  | F204 | 2666.04 | 2.57      | 3.335(19) | 138         | 0.5                                                        | C12 | H12  | F214 | 1455.04 | 2.64      | 3.19(3)   | 118         |                      |
| 0.5                                                       | C14 | H14  | F214 | 2666.04 | 2.42      | 3.16(15)  | 135         | 0.5                                                        | C14 | H14  | F201 | 2666.04 | 2.62      | 3.43(3)   | 147         |                      |
| 0.5                                                       | C15 | H15  | F202 |         | 2.62      | 3.198(18) | 120         | 0.5                                                        | C14 | H14  | F214 | 2666.04 | 2.56      | 3.37(3)   | 146         |                      |
| 0.5                                                       | C16 | H16A | F102 | 1565.03 | 2.47      | 3.402(18) | 159         | 0.5                                                        | C15 | H15  | F202 |         | 2.62      | 3.29(3)   | 129         |                      |
| 0.5                                                       | C16 | H16A | F112 | 1565.03 | 2.51      | 3.31(2)   | 139         | 0.5                                                        | C16 | H16A | F102 | 1565.03 | 2.66      | 3.42(4)   | 136         |                      |
| 0.5                                                       | C16 | H16B | F201 | 2666.04 | 2.57      | 3.46(2)   | 152         | 0.5                                                        | C16 | H16C | F114 | 2566.03 | 2.59      | 3.04(3)   | 109         |                      |
| 0.5                                                       | C16 | H16C | F114 | 2566.03 | 2.5       | 2.97(2)   | 109         | 0.5                                                        | C17 | H17A | F215 | 1455.04 | 2.38      | 3.29(4)   | 156         |                      |
| 0.5                                                       | C17 | H17B | F104 |         | 2.62      | 3.564(18) | 160         | 0.5                                                        | C17 | H17B | F103 |         | 2.61      | 3.49(4)   | 150         |                      |
| 0.5                                                       | C18 | H18A | F206 |         | 2.66      | 3.526(16) | 146         | 0.5                                                        | C18 | H18A | F213 |         | 2.43      | 3.38(4)   | 170         |                      |
| 0.5                                                       | C18 | H18A | F213 |         | 2.66      | 3.627(17) | 165         | 0.35                                                       | C20 | H20A | F101 |         | 2.65      | 3.57(4)   | 162         |                      |
| 0.5                                                       | C20 | H20A | F101 | 2555.03 | 2.57      | 3.55(2)   | 175         | 6.35 Number of contacts considering site occupancy factors |     |      |      |         |           |           |             |                      |
| 7 Number of contacts considering site occupancy factors   |     |      |      |         |           |           |             |                                                            |     |      |      |         |           |           |             |                      |

**Figure S4.** Powder patterns simulated using the experimentally-determined single-crystal structures as input. For the  $\gamma$ -form, MAZXOB01 was used. Dotted lines are used as a guide to the eye to facilitate comparison with Figs. 8, 9 and 10 in the paper for Triolo *et al.*<sup>12</sup> The program Mercury<sup>11</sup> was used to generate the simulated patterns. Input parameters were as following:  $\lambda = 1.54056 \text{ \AA}$ ;  $2\theta$  range:  $2-20^\circ$ ,  $2\theta$  Step:  $0.02^\circ$ . FWHM Peak shape: 0.1. Tick marks colour: magenta; systematic absences colour: green.

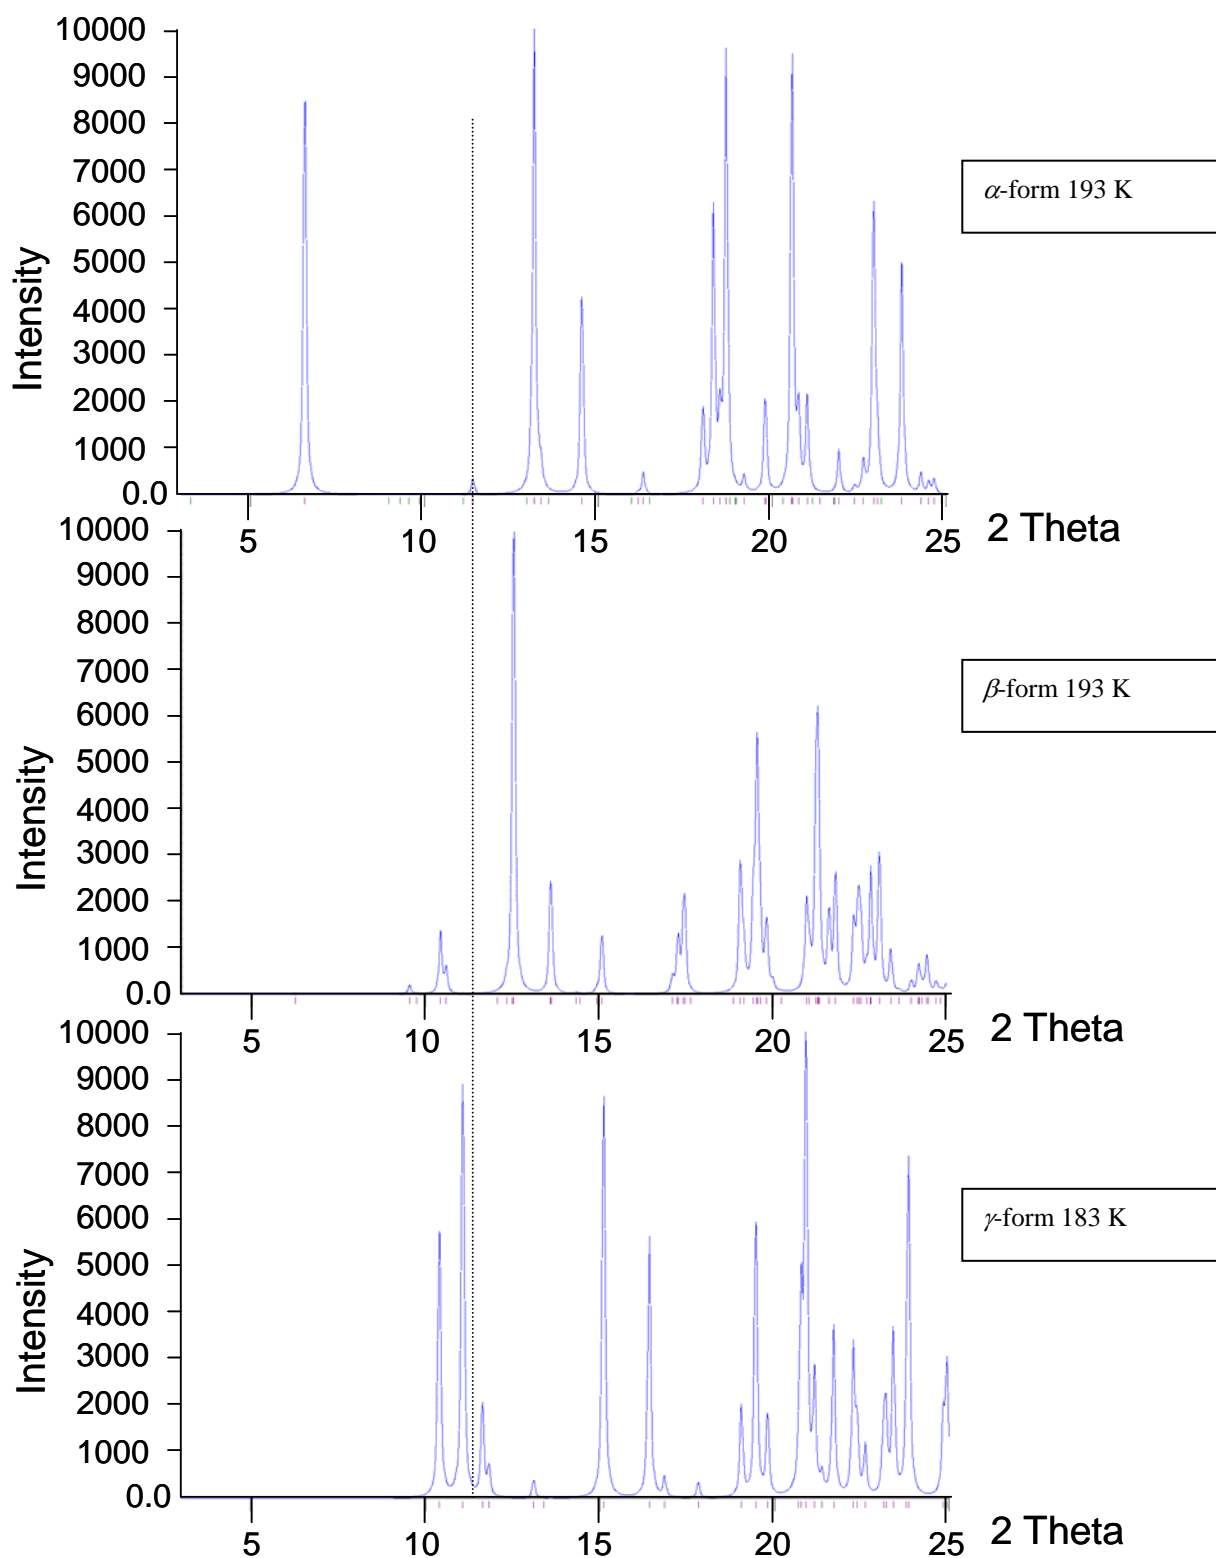

## References

---

- <sup>1</sup> Bruker-Nonius, SAINT version 7.32A, 2006, Bruker-AXS, Madison, Wisconsin, USA.
- <sup>2</sup> A. Dawson, D. R. Allan, S. Parsons, and M. Ruf, *J. Appl. Cryst.*, 2004, **37**, 410.
- <sup>3</sup> G. M. Sheldrick, SADABS Version 2008-1, 2008, Bruker-AXS, Madison, Wisconsin, USA.
- <sup>4</sup> S. Parsons, SHADE, 2004, The University of Edinburgh, Edinburgh, United Kingdom.
- <sup>5</sup> G. M. Sheldrick, *Acta Crystallogr. Sect. A: Found. Crystallogr.*, 2008, **64**, 112.
- <sup>6</sup> C. B. Hübschle, G. M. Sheldrick and B.; Dittrich, *J. Appl. Cryst.*, 2012, **44**, 1281.
- <sup>7</sup> G. M. Sheldrick, TWINABS version 2008/2, 2008, Bruker-AXS, Madison, Wisconsin, USA.
- <sup>8</sup> D. J. Watkin, *J. Appl. Cryst.*, 2008, **41**, 491.
- <sup>9</sup> T. Endo, T. Kato, K.-i Tozaki and K. Nishikawa, *J. Phys. Chem. B*, 2010, **114**, 407.
- <sup>10</sup> A. L. Spek, *Acta Crystallogr. Sect. D Biol. Crystallogr.*, 2009, **65**, 148.
- <sup>11</sup> C. F. Macrae, I. J. Bruno, J. A. Chisholm, P. R. Edgington, P. McCabe, E. Pidcock, L. Rodriguez-Monge, R. Taylor, J. van de Streek and P. A. Wood, *J. Appl. Cryst.*, 2008, **41**, 466.
- <sup>12</sup> A. Triolo, O. Russina, C. Hardacre, M. Nieuwenhuyzen, M. A. Gonzalez and H. Grimm, *J. Phys. Chem. B*, 2005, **109**, 22061.
